# Supplementary material for: Quantifying antibiotic use in typhoid fever in India: a cross-sectional analysis of private sector medical audit data, 2013–2015
Source: PubMed Central journal article supplement — BMJ Open. 2022 Oct 17;12(10):e062401. doi: 10.1136/bmjopen-2022-062401 (PMC9577907; doi:10.1136/bmjopen-2022-062401), 2022-10-17

## Supplementary file: Quantifying antibiotic use in typhoid fever in India: A cross-sectional analysis of private sector medical audit data, 2013-15

Supplementary table 1: Recoding of IQVIA ATC groups to WHO ATC groups

| Antibiotic                 | IQVIA ATC | WHO ATC |
|----------------------------|-----------|---------|
| Ambroxol+Roxithromycin     | J01FG     | J01F    |
| Amikacin                   | J01K3     | J01G    |
| Amoxy + Cloxa. Solids      | J01CD     | J01R    |
| Amoxy. & Clav. Inject.     | J01CI     | J01R    |
| Amoxy. & Clav. Liquids     | J01CH     | J01R    |
| Amoxy. & Clav. Solids      | J01CG     | J01R    |
| Amoxy. & Clav. Solids      | J01CG     | J01R    |
| Amoxy. +Clav. +Lactob.A.   | J01CL     | J01R    |
| Amoxy. +Cloxa. +Lactob.A.  | J01CK     | J01R    |
| Amoxy. +Lactob.A.          | J01CJ     | J01R    |
| Amoxicillin Injectables    | J01C6     | J01C    |
| Amoxicillin Oral Liquids   | J01C5     | J01C    |
| Amoxicillin Oral Solids    | J01C4     | J01C    |
| Ampicillin Injectables     | J01C3     | J01C    |
| Ampicillin Oral Solids     | J01C1     | J01C    |
| Azithromycin Injectables   | J01F6     | J01F    |
| Azithromycin Oral Liquids  | J01F5     | J01F    |
| Azithromycin Oral Solids   | J01F4     | J01F    |
| Azithromycin+Levoflox.     | J01LL     | J01R    |
| Balofloxacin               | J01LW     | J01M    |
| Cefadroxil + Clavulanic A  | J01DH     | J01R    |
| Cefadroxil Oral Liquids    | J01D5     | J01D    |
| Cefadroxil Oral Solids     | J01D4     | J01D    |
| Cefdinir Oral Sol.&Liq.    | J01D7     | J01D    |
| Cefixime + Azithromycin    | J01D8     | J01R    |
| Cefixime + Clav. Liquids   | J01D6     | J01R    |
| Cefixime + Clav. Solids    | J01D3     | J01R    |
| Cefixime + Linezolid       | J01M2     | J01R    |
| Cefixime + Ofloxacin       | J01DS     | J01R    |
| Cefixime Oral Liq.         | J01DM     | J01D    |
| Cefixime Oral Sol.         | J01DL     | J01D    |
| Cefixime+Cloxa. +Lactob.A. | J01DY     | J01R    |
| Cefixime+Lactob.A.         | J01DX     | J01R    |
| Cefoperazone Injectables   | J01DG     | J01D    |
| Cefoperazone+Sulbactam     | J01DO     | J01R    |
| Cefotaxime Injectables     | J01DD     | J01D    |
| Cefpod. + Clav. Liquids    | J01DQ     | J01R    |
| Cefpodoxime Liquids        | J01DW     | J01D    |
| Cefpodoxime Solids         | J01DV     | J01D    |

| Antibiotic                | IQVIA ATC | WHO ATC |
|---------------------------|-----------|---------|
| Ceftazidime Injectables   | J01DE     | J01D    |
| Ceftriaxone + Tazobactam  | J01D9     | J01R    |
| Ceftriaxone Injectables   | J01DC     | J01D    |
| Ceftriaxone+Sulbactam     | J01DZ     | J01R    |
| Cefuroxime Injectables    | J01DF     | J01D    |
| Cefuroxime Oral Liquid    | J01DK     | J01D    |
| Cefuroxime Oral Solids    | J01DI     | J01D    |
| Cephalexin Oral Liquids   | J01D2     | J01D    |
| Cephalexin Oral Solids    | J01D1     | J01D    |
| Chloram. - Comb. Inject.  | J01B3     | J01B    |
| Chloram. - Comb. Liquids  | J01B2     | J01B    |
| Chloram. - Comb. Solids   | J01B1     | J01B    |
| Ciprofloxacin Injectables | J01L3     | J01M    |
| Ciprofloxacin Oral Solids | J01L1     | J01M    |
| Clarithromycin Injectable | J01FC     | J01F    |
| Clarithromycin Oral Liqui | J01FB     | J01F    |
| Clarithromycin Oral Solid | J01FA     | J01F    |
| Clavulanic Acid+Cefuroxi  | J01DP     | J01R    |
| Clindamycin               | J01FD     | J01F    |
| Cloxa. & Ampicomb. Inject | J01CC     | J01R    |
| Cloxa. & Ampicomb. Solid  | J01CA     | J01R    |
| Colistine Inj.            | J01KD     | J01X    |
| Doxycycline Oral Solids   | J01A5     | J01A    |
| Doxycycline+Lactob A.     | J01A8     | J01R    |
| Erythromycin Oral Liquids | J01F2     | J01F    |
| Erythromycin Oral Solids  | J01F1     | J01F    |
| Faropenem                 | J01N2     | J01D    |
| Gatifloxacin              | J01LG     | J01M    |
| Gemifloxacin              | J01LI     | J01M    |
| Gentamycin                | J01K1     | J01G    |
| Levofloxacin              | J01LF     | J01M    |
| Lincomycin                | J01FE     | J01F    |
| Linezolid                 | J01M1     | J01X    |
| Macrolides Combination So | J01FM     | J01R    |
| Meropenem                 | J01N1     | J01D    |
| Metronidazole Inj.        | J01K2     | J01X    |
| Moxifloxacin              | J01LH     | J01M    |
| Netilmicin                | J01KH     | J01G    |
| Norfloxacin Oral Solids   | J01L4     | J01M    |
| Ofloxacin Injectables     | J01LE     | J01M    |
| Ofloxacin Oral Liquids    | J01LD     | J01M    |
| Ofloxacin Oral Solids     | J01LC     | J01M    |
| Ofloxacin+Cefpodoxime     | J01LK     | J01R    |
| Oth. Amoxy. Comb. Sol.    | J01CP     | J01R    |

| <b>Antibiotic</b>         | <b>IQVIA ATC</b> | <b>WHO ATC</b> |
|---------------------------|------------------|----------------|
| Oth. Ampic. Comb. Inj.    | J01CO            | J01R           |
| Oth. Ampic. Comb. Sol.    | J01CM            | J01R           |
| Oth. Cephalo Liquids      | J01DB            | J01D           |
| Oth. Cephalo. Inje        | J01DT            | J01D           |
| Oth. Cephalo. Solids      | J01DA            | J01D           |
| Oth.Cephalo.Comb.Inj.     | J01DU            | J01R           |
| Oth.Cephalo.Comb.Sol&Liq. | J01DR            | J01R           |
| Other Antibiotics         | J01K9            | J01X           |
| Other Penicillines-Inject | J01H2            | J01C           |
| Other Penicillines-Orals  | J01H1            | J01C           |
| Other Quino.Injectables   | J01LV            | J01M           |
| Other Quino.Oral Liquids  | J01LU            | J01M           |
| Other Quino.Oral Solids   | J01LT            | J01M           |
| Piperacillin+Tazobactam   | J01K5            | J01R           |
| Prulifloxacin             | J01LJ            | J01M           |
| Quino.Comb. Oral Solids   | J01LX            | J01R           |
| Roxithromycin Oral Liquid | J01F8            | J01F           |
| Roxithromycin Oral Solids | J01F7            | J01F           |
| Sparfloxacin Oral Solids  | J01LB            | J01M           |
| Streptomycines And Comb.  | J01G1            | J01G           |
| Sulbactam+Cefotaxime      | J01DJ            | J01R           |
| Tetra.Oral Solids         | J01A1            | J01A           |
| Trimetho. & Simi. Liquids | J01E2            | J01E           |
| Trimetho. & Simi. Solids  | J01E1            | J01E           |

Supplementary table 2: Average rate of antibiotic prescriptions for typhoid across sexes (per 100,000 population), 2013-15

| Age groups   | Male | Female | Difference, % |
|--------------|------|--------|---------------|
| 0 - 4 years  | 555  | 398    | 28            |
| 5 - 9 years  | 507  | 368    | 27            |
| 10 -19 years | 537  | 414    | 23            |
| 20- 29 years | 840  | 769    | 8             |
| 30- 39 years | 711  | 610    | 14            |
| 40- 49 years | 561  | 445    | 21            |
| 50- 59 years | 454  | 366    | 20            |
| 60- 64 years | 353  | 312    | 12            |
| 65 & above   | 269  | 233    | 13            |

Supplementary figure 1: Age and sex specific prescription rates for typhoid (per 100,000 population) in 2013, 2014 and 2015

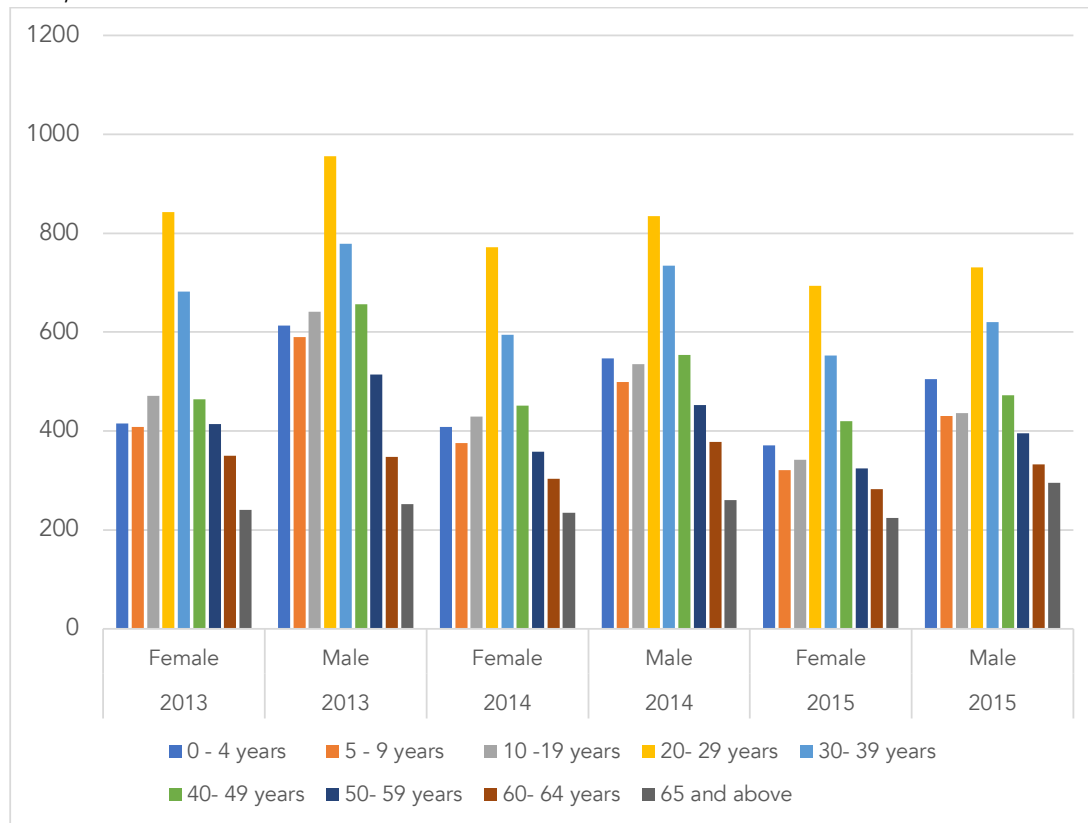

Supplementary figure 2: Share (in percentage) of various antibiotic classes for typhoid across years 2013 to 2015

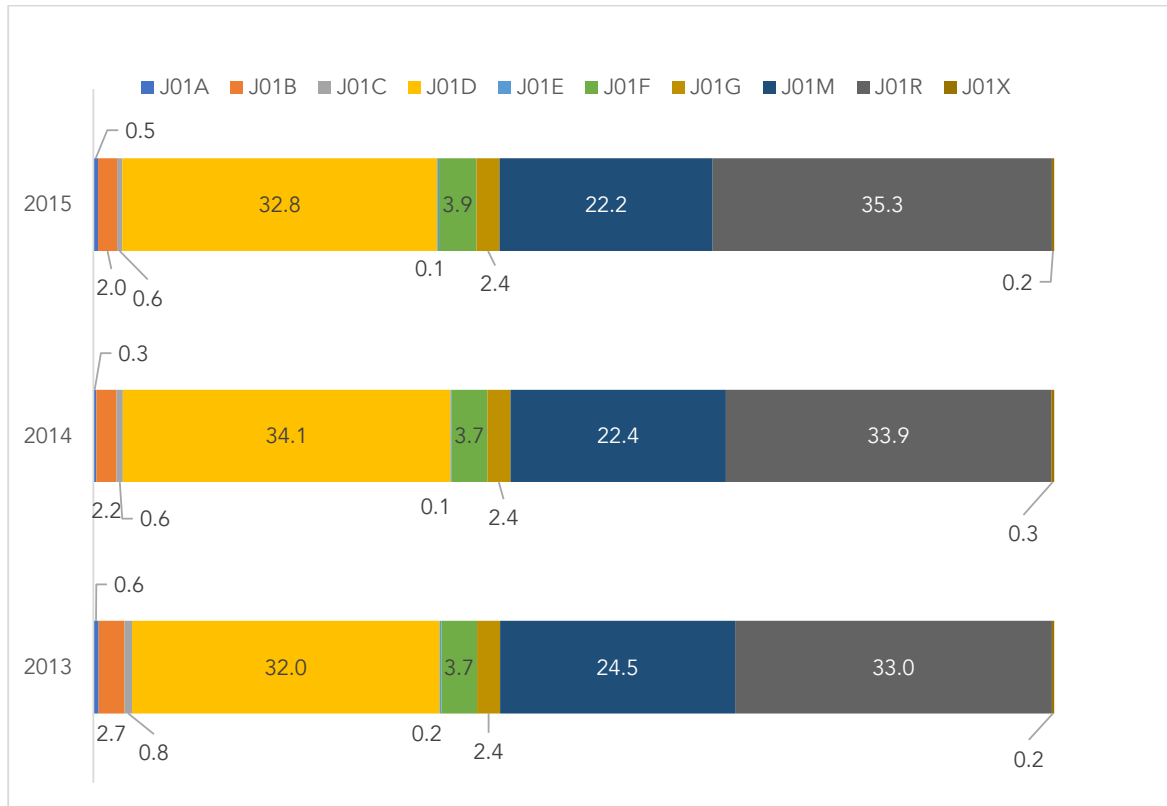

Supplementary figure 3: Number of different prescriptions for typhoid across age groups, 2013-2015

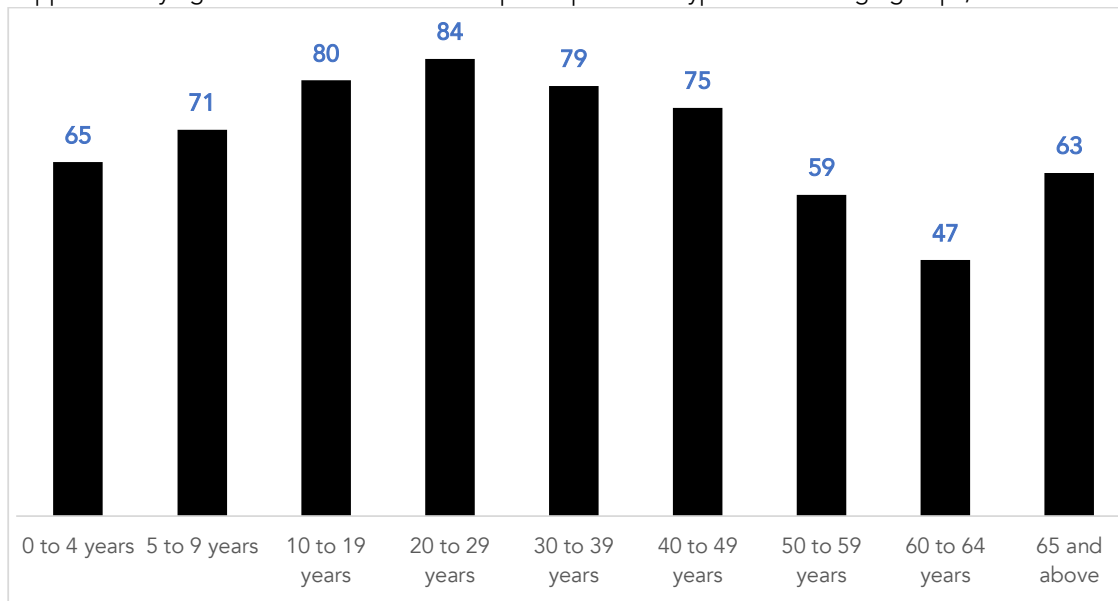

Supplementary figure 4. Top ten prescriptions (in numbers) for typhoid across India, 2015

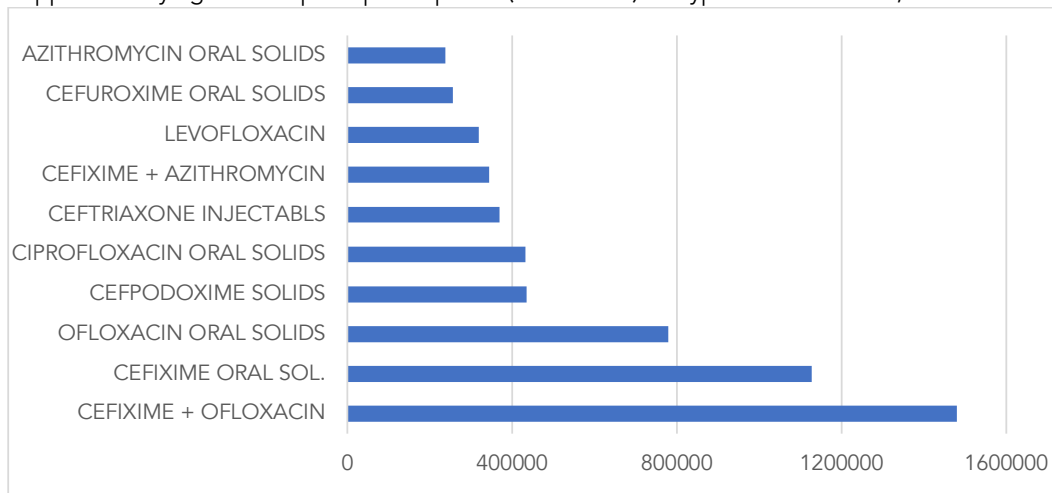

Supplementary figure 5: Top five prescriptions (in numbers) for typhoid across cities and metros, 2015 (number)

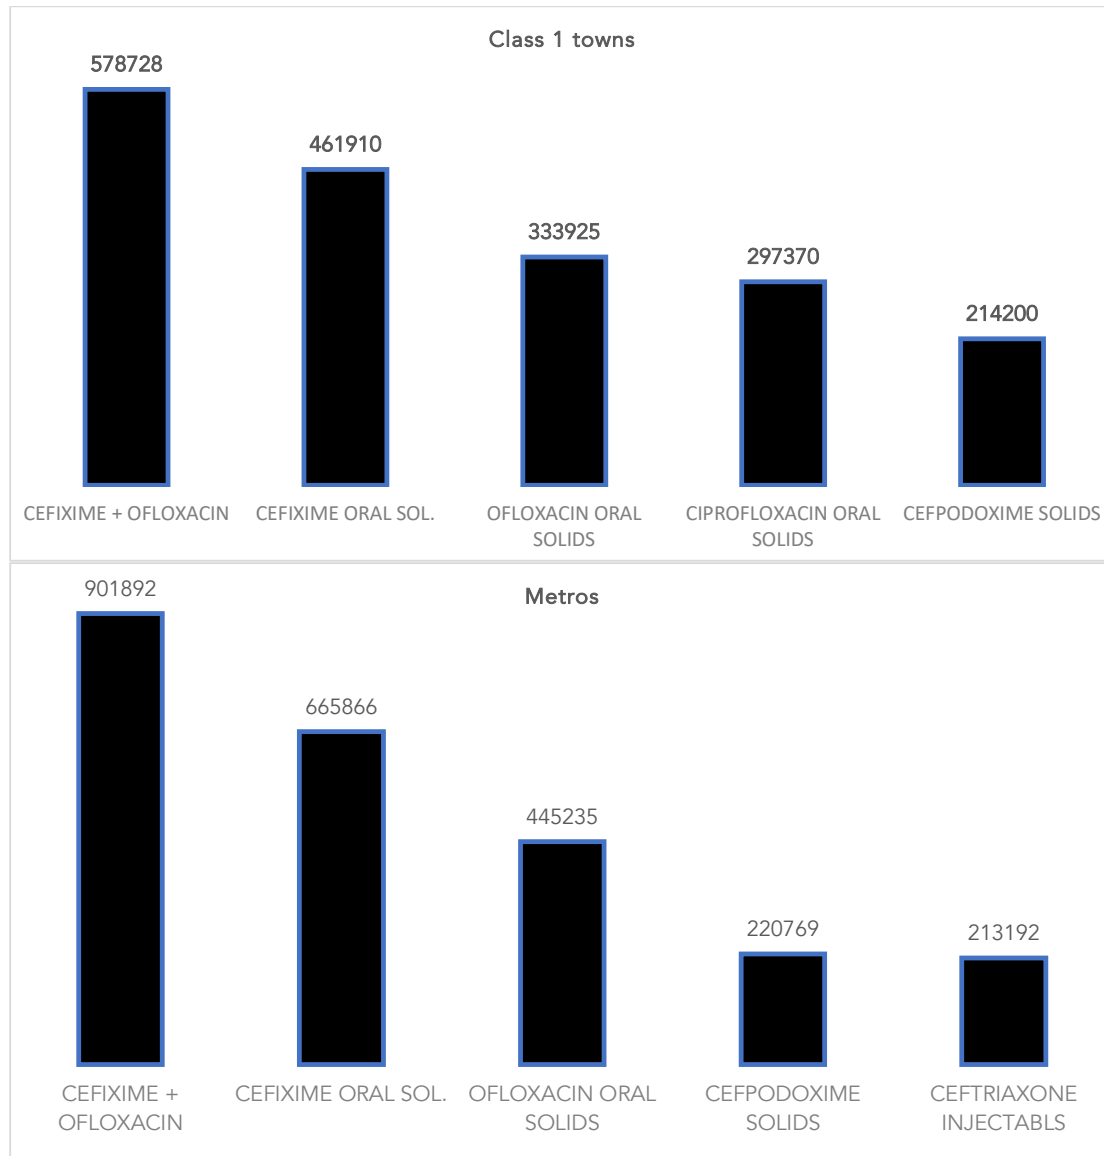



Supplementary figure 6: Top five prescriptions (in numbers) for typhoid across zones, 2015 (Numbers)

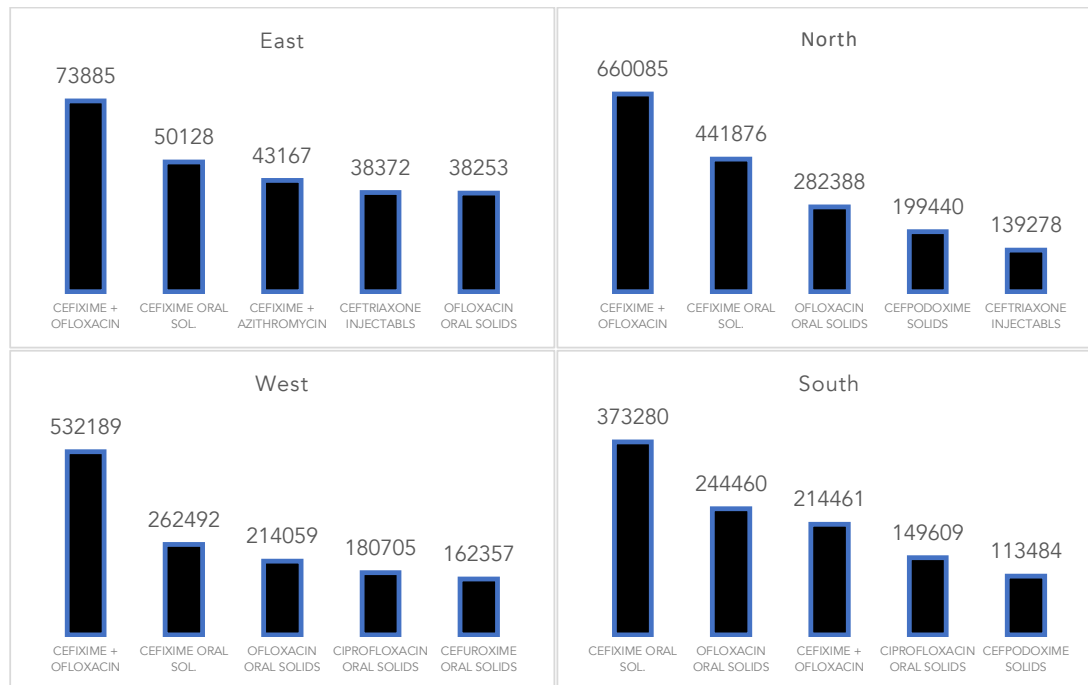

Supplementary figure 7: Age- group wise average rate of prescription of typhoid antibiotics, 2013-15

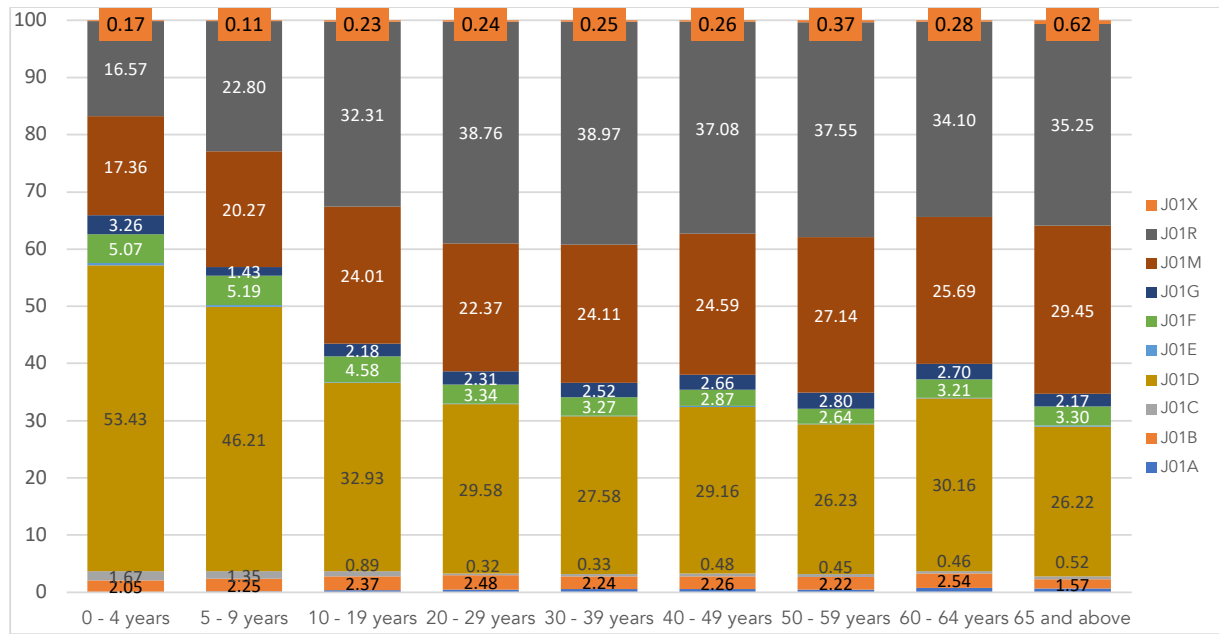

Supplement: bmjopen-2022-062401supp001.pdf [file bmjopen-2022-062401supp001.pdf]
